# Supplementary material for: A de novo KMT2D mutation in a girl with Kabuki syndrome associated with endocrine symptoms: a case report
Source: PubMed Central journal article supplement (PMC6007063; doi:10.1186/s12881-018-0606-9), 2018-06-18

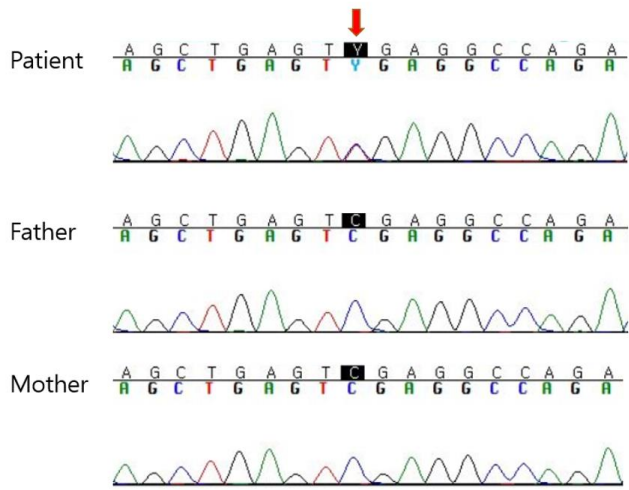

Supplement: 12881_2018_606_MOESM1_ESM.pdf [file 12881_2018_606_MOESM1_ESM.pdf]
